# Supplementary material for: Pathogenic Variants in STXBP1 and in Genes for GABAa Receptor Subunities Cause Atypical Rett/Rett-like Phenotypes
Source: MDPI journal article supplement (doi:10.3390/ijms20153621), 2019-07-24
Supplement: s1 [file s1]

| PATIENTS | VARIANT                    | Forward                     | Reverse                     |
|----------|----------------------------|-----------------------------|-----------------------------|
| 1        | STXBP1: c.416C>T           | TGAAGAGCCCACTGTACATGT       | GGCAGGCCCTATGGAATACT        |
| 2        | STXBP1: c.1099C>T          | AGTACTCCACCCACCTGCAC        | GCCTTCCCGTCTCTATTTCC        |
| 3        | STXBP1: c.169+2T>C         | AGATGCCATGAAGCCCATAC        | GCTGGAAGAATCTAAAATCAAAGG    |
| 4        | STXBP1: c.767T>C           | TGCTGCCCTCCTTTACAAGA        | GAGCTGAGATTGTGCCACTG        |
| 5        | STXBP1: c.1702+1G>A        | ACCGATTCCACGCTGCGTCG        | CCATTGTTGGAGCCTGATCC        |
| 6        | STXBP1: c.1216 C>T         | GGAGCCAATGAGGTGTGTTT        | AATGACTGGGGGACATTCAG        |
| 7        | GABRG2: c.937_938 delinsGG | AGTCTCACGAGTGACTCAGTTACCCAA | GTTATGGCCTGGCTAAACTCATACATG |
|          |                            | TCCCTGTATTCTCCATGGCA        | TTGTCCTTGCTTGGTTTCCG        |
|          |                            | TTCCCATGCTGAAACTGCC         | CCTTGCTTGGTTTCCG            |
| 8        | GABRB2: c.904G>A           | ACCACAATCAACACCCACCTCCG     | GGCGCATCTTCTCATTGTTGGCACTG  |

Supplementary Table 2 Primers used for variants validation by Sanger sequencing
